# Supplementary material for: Potential impact of a US climate policy and air quality regulations on future air quality and climate change
Source: Copernicus journal article supplement (doi:10.5194/acp-16-5323-2016), 2016-04-28
Supplement: Supplementary file 1 [file acp-16-5323-2016-supplement.pdf]

Supplement of Atmos. Chem. Phys., 16, 5323–5342, 2016  
<http://www.atmos-chem-phys.net/16/5323/2016/>  
doi:10.5194/acp-16-5323-2016-supplement  
© Author(s) 2016. CC Attribution 3.0 License.

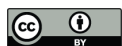

Atmospheric  
Chemistry  
and Physics  
Open Access  
EGU

*Supplement of*

## **Potential impact of a US climate policy and air quality regulations on future air quality and climate change**

**Yunha Lee et al.**

*Correspondence to:* Yunha Lee (yunha.lee.00@gmail.com)

The copyright of individual parts of the supplement might differ from the CC-BY 3.0 licence.

- 1 Table S1. US mean concentrations of air pollutants in the baseline (bs05) simulation.
- 2 All PM has a unit of  $\mu\text{g m}^{-3}$ , and gases have a unit of ppb.

| Species                        | OMA   | TOMAS |
|--------------------------------|-------|-------|
| PM2.5 [ $\mu\text{g m}^{-3}$ ] | 8.5   | 6.4   |
| SO <sub>4</sub>                | 1.2   | 1.9   |
| BC                             | 0.2   | 0.3   |
| OC                             | 1.3   | 1.2   |
| NO <sub>3</sub>                | 1.4   | 0.0   |
| SS                             | 4.1   | 2.2   |
| DU                             | 0.3   | 0.8   |
| NO <sub>x</sub> [ppb]          | 3.2   | 3.0   |
| O <sub>3</sub> [ppb]           | 57.2  | 58.9  |
| CO [ppb]                       | 174.0 | 166.7 |

- 3
- 4
- 5

1 Table S2. Changes in US mean air pollution due to the current AQ regulations and  
 2 CO<sub>2</sub> reduction policy in ModelE2-OMA (averaged over the 50 U.S states). All PM has  
 3 a unit of  $\mu\text{g m}^{-3}$ , and gases have a unit of ppb. O<sub>3</sub> and CO are multiplied by 0.1.

| ModelE2-OMA           | CO <sub>2</sub> 30 | CO <sub>2</sub> NQ30 | AQ30  | BOTH30 | CO <sub>2</sub> 55 | CO <sub>2</sub> NQ55 | AQ55  | BOTH55 |
|-----------------------|--------------------|----------------------|-------|--------|--------------------|----------------------|-------|--------|
| SO <sub>4</sub>       | -0.11              | -0.33                | -0.51 | -0.62  | -0.14              | -0.52                | -0.54 | -0.68  |
| EC                    | 0.02               | 0.02                 | -0.12 | -0.11  | 0.01               | 0.01                 | -0.15 | -0.14  |
| OM                    | 0.01               | 0.01                 | -0.34 | -0.33  | -0.05              | -0.10                | -0.41 | -0.45  |
| NO <sub>3</sub>       | -0.05              | -0.05                | -0.76 | -0.81  | -0.16              | -0.21                | -0.84 | -1.00  |
| PM2.5                 | -0.13              | -0.36                | -1.74 | -1.87  | -0.34              | -0.82                | -1.92 | -2.27  |
| NO <sub>x</sub>       | 0.08               | 0.03                 | -1.94 | -1.85  | -0.05              | -0.41                | -2.18 | -2.23  |
| O <sub>3</sub> [x0.1] | 0.07               | 0.06                 | -0.83 | -0.77  | 0.00               | -0.11                | -0.87 | -0.86  |
| CO [x0.1]             | 0.02               | -0.01                | -1.86 | -1.84  | -0.35              | -1.25                | -2.18 | -2.53  |

4

5

6 Table S3. Same as the S-Table 2 but with ModelE2-TOMAS.

| ModelE2-<br>TOMAS     | CO <sub>2</sub> 30 | CO <sub>2</sub> NQ30 | AQ30  | BOTH30 | CO <sub>2</sub> 55 | CO <sub>2</sub> NQ55 | AQ55  | BOTH55 |
|-----------------------|--------------------|----------------------|-------|--------|--------------------|----------------------|-------|--------|
| SO <sub>4</sub>       | -0.15              | -0.46                | -0.73 | -0.88  | -0.20              | -0.73                | -0.77 | -0.97  |
| EC                    | 0.02               | 0.02                 | -0.14 | -0.13  | 0.01               | 0.01                 | -0.17 | -0.16  |
| OM                    | -0.01              | -0.01                | -0.06 | -0.07  | -0.05              | -0.05                | -0.08 | -0.13  |
| PM2.5                 | -0.14              | -0.46                | -0.94 | -1.08  | -0.25              | -0.77                | -1.02 | -1.27  |
| NO <sub>x</sub>       | 0.08               | 0.03                 | -1.86 | -1.78  | -0.04              | -0.40                | -2.09 | -2.13  |
| O <sub>3</sub> [x0.1] | 0.08               | 0.07                 | -0.94 | -0.86  | 0.01               | -0.12                | -1.00 | -0.99  |
| CO [x0.1]             | 0.03               | -0.01                | -2.04 | -2.02  | -0.34              | -1.26                | -2.38 | -2.72  |

7

8

9

1 Table S4. Global mortality changes for ModelE2-OMA

2

| ModelE2-OMA                  | CO <sub>2</sub> 30 | CO <sub>2</sub> NQ30 | AQ30   | BOTH30 | CO <sub>2</sub> 55 | CO <sub>2</sub> NQ55 | AQ55   | BOTH55 |
|------------------------------|--------------------|----------------------|--------|--------|--------------------|----------------------|--------|--------|
| <i>CRF<sub>low,pm</sub></i>  | 1530               | 3460                 | 16290  | 17820  | 4800               | 7800                 | 17600  | 22400  |
| <i>CRF<sub>base,pm</sub></i> | 6300               | 20200                | 83800  | 90100  | 21000              | 42000                | 91000  | 112000 |
| <i>CRF<sub>high,pm</sub></i> | 22600              | 37000                | 195200 | 217800 | 70000              | 89000                | 213000 | 283000 |
| <i>CRF<sub>low,O3</sub></i>  | -1626              | -1690                | 19080  | 17454  | -20                | 2990                 | 20900  | 20880  |
| <i>CRF<sub>base,O3</sub></i> | -2590              | -2250                | 29950  | 27360  | -30                | 5050                 | 35470  | 35440  |

3

4

5

1 Table S5. Global mean RF summary for ModelE2-OMA

| ModelE2-OMA     | CO <sub>2</sub> 30 | CO <sub>2</sub> NQ30 | AQ30         | BOTH30       | CO <sub>2</sub> 55 | CO <sub>2</sub> NQ55 | AQ55         | BOTH55        |
|-----------------|--------------------|----------------------|--------------|--------------|--------------------|----------------------|--------------|---------------|
| ADF             | 0.004              | 0.011                | 0.023        | 0.027        | 0.007              | 0.018                | 0.023        | 0.030         |
| SO <sub>4</sub> | 0.005              | 0.014                | 0.023        | 0.027        | 0.007              | 0.023                | 0.025        | 0.031         |
| EC              | 0.001              | 0.001                | -0.006       | -0.005       | 0.000              | 0.000                | -0.007       | -0.007        |
| OC              | 0.000              | 0.000                | 0.002        | 0.007        | 0.000              | 0.001                | 0.003        | 0.003         |
| SS              | 0.000              | 0.000                | 0.000        | 0.000        | 0.000              | 0.000                | 0.000        | 0.000         |
| DU              | 0.000              | 0.000                | 0.000        | 0.000        | 0.000              | 0.000                | 0.001        | 0.000         |
| NO <sub>3</sub> | -0.001             | -0.004               | 0.004        | 0.003        | -0.001             | -0.006               | 0.003        | 0.003         |
| BCalb           | 0.000              | 0.000                | -0.001       | -0.001       | 0.000              | 0.000                | -0.002       | -0.002        |
| AIF             | 0.0044             | 0.011                | 0.029        | 0.033        | 0.009              | 0.020                | 0.032        | 0.041         |
| O <sub>3</sub>  | 0.0006             | 0.000                | -0.015       | -0.014       | -0.001             | -0.004               | -0.016       | -0.017        |
| CO <sub>2</sub> | -0.024             | -0.024               | 0.000        | -0.024       | -0.070             | -0.070               | 0.000        | -0.070        |
| CH <sub>4</sub> | -0.0012            | -0.004               | 0.010        | 0.009        | -0.001             | -0.006               | 0.009        | 0.008         |
| <b>Total</b>    | <b>-0.0158</b>     | <b>-0.007</b>        | <b>0.045</b> | <b>0.030</b> | <b>-0.057</b>      | <b>-0.042</b>        | <b>0.047</b> | <b>-0.010</b> |

2

3 Table S6. US mean RF summary for ModelE2-OMA

| ModelE2-OMA     | CO <sub>2</sub> 30 | CO <sub>2</sub> NQ30 | AQ30        | BOTH30      | CO <sub>2</sub> 55 | CO <sub>2</sub> NQ55 | AQ55        | BOTH55      |
|-----------------|--------------------|----------------------|-------------|-------------|--------------------|----------------------|-------------|-------------|
| ADF             | 0.099              | 0.17                 | 0.55        | 0.65        | 0.18               | 0.33                 | 0.56        | 0.74        |
| SO <sub>4</sub> | 0.090              | 0.26                 | 0.45        | 0.51        | 0.12               | 0.42                 | 0.45        | 0.57        |
| EC              | 0.015              | 0.015                | -0.12       | -0.106      | 0.007              | 0.009                | -0.14       | -0.14       |
| OC              | -0.002             | -0.002               | 0.052       | 0.050       | 0.005              | 0.013                | 0.062       | 0.068       |
| SS              | 0.000              | 0.000                | 0.000       | 0.000       | 0.000              | 0.000                | 0.000       | 0.000       |
| DU              | 0.000              | 0.000                | 0.000       | 0.000       | 0.000              | 0.000                | 0.000       | 0.000       |
| NO <sub>3</sub> | -0.004             | -0.104               | 0.201       | 0.196       | 0.043              | -0.120               | 0.193       | 0.236       |
| BCalb           | 0.003              | 0.002                | -0.032      | -0.029      | 0.000              | 0.000                | -0.036      | -0.036      |
| AIF             | 0.06               | 0.09                 | 0.38        | 0.44        | 0.12               | 0.17                 | 0.37        | 0.49        |
| O <sub>3</sub>  | 0.00               | 0.00                 | -0.07       | -0.07       | 0.00               | -0.01                | -0.07       | -0.08       |
| CO <sub>2</sub> | -0.02              | -0.02                | 0.00        | -0.02       | -0.07              | -0.07                | 0.00        | -0.07       |
| CH <sub>4</sub> | 0.00               | -0.01                | 0.00        | 0.01        | 0.00               | -0.01                | 0.00        | 0.00        |
| <b>Total</b>    | <b>0.14</b>        | <b>0.23</b>          | <b>0.83</b> | <b>0.99</b> | <b>0.22</b>        | <b>0.41</b>          | <b>0.82</b> | <b>1.05</b> |

4

5

6

7

8

1 Table S7. Global mean RF summary for ModelE2-TOMAS

| ModelE2-OMA     | CO <sub>2</sub> 30 | CO <sub>2</sub> NQ30 | AQ30         | BOTH30       | CO <sub>2</sub> 55 | CO <sub>2</sub> NQ55 | AQ55         | BOTH55        |
|-----------------|--------------------|----------------------|--------------|--------------|--------------------|----------------------|--------------|---------------|
| ADF             | 0.005              | 0.014                | 0.011        | 0.016        | 0.005              | 0.020                | 0.010        | 0.015         |
| SO <sub>4</sub> | 0.003              | 0.011                | 0.017        | 0.020        | 0.004              | 0.016                | 0.017        | 0.021         |
| EC              | 0.002              | 0.003                | -0.006       | -0.004       | 0.001              | 0.004                | -0.007       | -0.006        |
| OC              | 0.000              | 0.000                | 0.000        | 0.001        | 0.000              | 0.000                | 0.001        | 0.001         |
| SS              | 0.000              | 0.000                | 0.000        | 0.000        | 0.000              | 0.000                | 0.000        | 0.000         |
| DU              | 0.000              | 0.000                | 0.000        | 0.000        | 0.000              | -0.001               | -0.001       | -0.001        |
| NO <sub>3</sub> |                    |                      |              |              |                    |                      |              |               |
| BCalb           | 0.000              | 0.000                | -0.002       | -0.002       | 0.000              | 0.000                | -0.003       | -0.003        |
| AIF             | 0.004              | 0.008                | 0.016        | 0.021        | 0.008              | 0.017                | 0.021        | 0.029         |
| O <sub>3</sub>  | 0.001              | 0.000                | -0.015       | -0.014       | -0.001             | -0.004               | -0.016       | -0.017        |
| CO <sub>2</sub> | -0.024             | -0.024               | 0.000        | -0.024       | -0.070             | -0.070               | 0.000        | -0.070        |
| CH <sub>4</sub> | -0.001             | -0.004               | 0.010        | 0.009        | -0.001             | -0.006               | 0.009        | 0.008         |
| <b>Total</b>    | <b>-0.015</b>      | <b>-0.007</b>        | <b>0.020</b> | <b>0.005</b> | <b>-0.059</b>      | <b>-0.043</b>        | <b>0.021</b> | <b>-0.038</b> |

2

3

4 Table S8. US mean RF summary for ModelE2-TOMAS

| ModelE2-OMA     | CO <sub>2</sub> 30 | CO <sub>2</sub> NQ30 | AQ30        | BOTH30      | CO <sub>2</sub> 55 | CO <sub>2</sub> NQ55 | AQ55        | BOTH55      |
|-----------------|--------------------|----------------------|-------------|-------------|--------------------|----------------------|-------------|-------------|
| ADF             | 0.05               | 0.15                 | 0.14        | 0.19        | 0.06               | 0.23                 | 0.14        | 0.20        |
| SO <sub>4</sub> | 0.04               | 0.13                 | 0.20        | 0.24        | 0.05               | 0.20                 | 0.21        | 0.26        |
| EC              | 0.01               | 0.02                 | -0.08       | -0.06       | 0.01               | 0.02                 | -0.09       | -0.08       |
| OC              | 0.00               | 0.00                 | 0.01        | 0.01        | 0.01               | 0.01                 | 0.01        | 0.02        |
| SS              | 0.00               | 0.00                 | 0.00        | 0.00        | 0.00               | 0.00                 | 0.00        | 0.00        |
| DU              | 0.00               | 0.00                 | 0.00        | 0.00        | 0.00               | 0.00                 | 0.00        | 0.00        |
| NO <sub>3</sub> | 0.00               | 0.00                 | 0.00        | 0.00        | 0.00               | 0.00                 | 0.00        | 0.00        |
| BCalb           | 0.00               | 0.00                 | -0.04       | -0.03       | 0.00               | 0.00                 | -0.04       | -0.04       |
| AIF             | 0.08               | 0.12                 | 0.25        | 0.34        | 0.14               | 0.22                 | 0.27        | 0.41        |
| O <sub>3</sub>  | 0.00               | 0.00                 | -0.07       | -0.07       | 0.00               | -0.01                | -0.08       | -0.08       |
| CO <sub>2</sub> | -0.02              | -0.02                | 0.00        | -0.02       | -0.07              | -0.07                | 0.00        | -0.07       |
| CH <sub>4</sub> | 0.00               | -0.01                | 0.00        | 0.01        | 0.00               | -0.01                | 0.00        | 0.00        |
| <b>Total</b>    | <b>0.12</b>        | <b>0.24</b>          | <b>0.28</b> | <b>0.40</b> | <b>0.14</b>        | <b>0.35</b>          | <b>0.29</b> | <b>0.43</b> |

5

6
